# Supplementary material for: The Protective Effect of Magnesium Lithospermate B on Hepatic Ischemia/Reperfusion via Inhibiting the Jak2/Stat3 Signaling Pathway
Source: PubMed Central journal article supplement (PMC6558428; doi:10.3389/fphar.2019.00620), 2019-05-31
Supplement: DataSheet_1.pdf [file DataSheet_1.pdf]

## Supplementary Material

### 1. Supplementary Figures

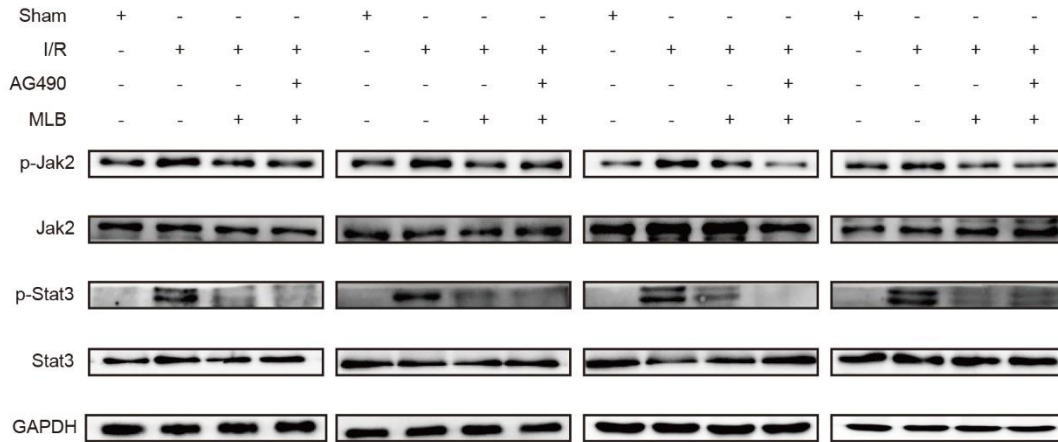

**Supplementary Figure 1.** MLB+AG490 pretreatment inhibited Jak2/Stat3 signal pathway in the liver tissue of I/R (This study was repeated five times. One figure was listed in figure 7. The rest four independent studies were listed as sFigure 1).

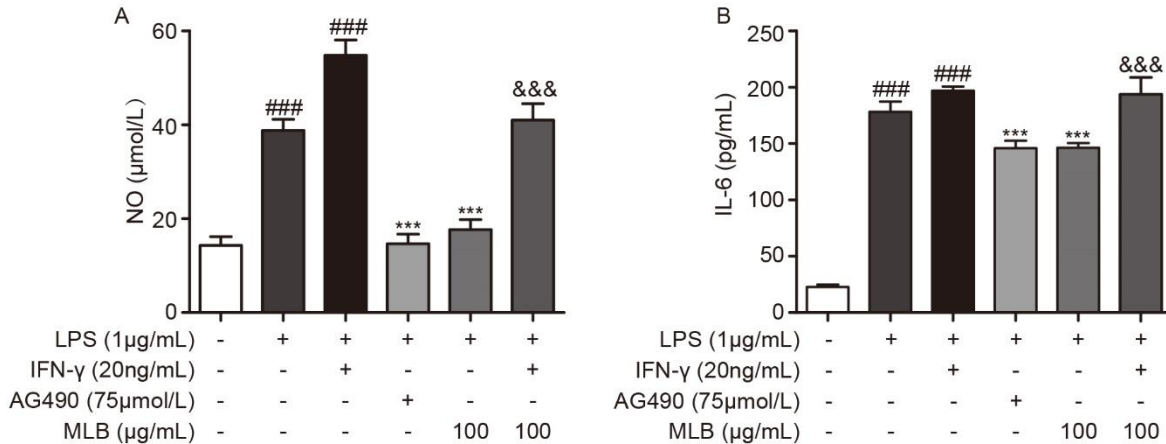

**Supplementary Figure 2.** IFN-γ reversed the inhibition of MLB in RAW264.7 cells. (A) The content of NO in different groups. (B) The secretion of IL-6 in different groups. Each value is expressed as mean ± S.D, n=4 for each group. ###P<0.001 versus NC group, \*\*\*P<0.001 versus LPS group, &&&P<0.001 versus MLB group.

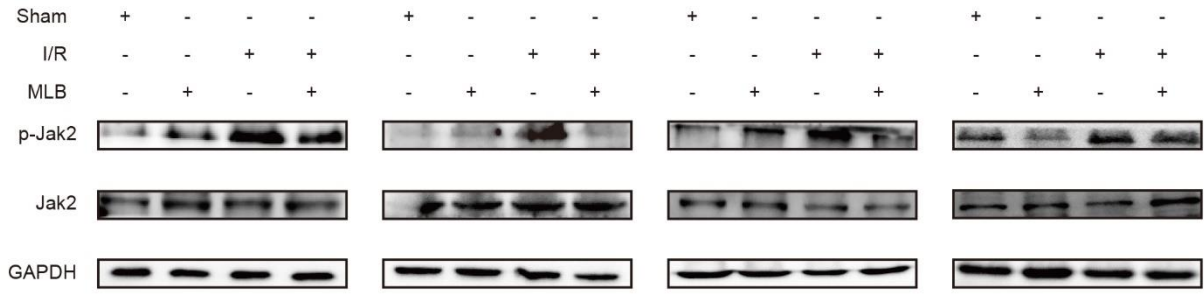

**Supplementary Figure 3.** MLB pretreatment inhibited Jak2/Stat3 signal pathway in the liver tissue of I/R. (This study was repeated five times. One figure was listed in figure 4A. The rest four independent studies were listed as sFigure 3).
